# Supplementary material
Source: HighWire-hosted journal article supplement (https://gut.bmj.com/content/70/3/537)
Supplement: inline-supplementary-material-1 [file inline-supplementary-material-1.pdf]

**Supplementary table 1: Number of endoscopy procedures by time period and change from pre-Covid period, by country and region within England**

| Country/region                                     | Time period* |                |
|----------------------------------------------------|--------------|----------------|
|                                                    | Pre-Covid    | Covid-impacted |
| <b>England</b>                                     |              |                |
| Average number of procedures per week              | 32679        | 3878           |
| % reduction in activity drop compared to pre-Covid |              | 88.1           |
| <i>East England</i>                                |              |                |
| Average number of procedures per week              | 3808         | 349            |
| % reduction in activity drop compared to pre-Covid |              | 90.8           |
| <i>East Midlands</i>                               |              |                |
| Average number of procedures per week              | 3090         | 398            |
| % reduction in activity drop compared to pre-Covid |              | 87.1           |
| <i>Greater London</i>                              |              |                |
| Average number of procedures per week              | 4742         | 443            |
| % reduction in activity drop compared to pre-Covid |              | 90.7           |
| <i>North East</i>                                  |              |                |
| Average number of procedures per week              | 2443         | 285            |
| % reduction in activity drop compared to pre-Covid |              | 88.3           |
| <i>North West</i>                                  |              |                |
| Average number of procedures per week              | 6041         | 726            |
| % reduction in activity drop compared to pre-Covid |              | 88.0           |
| <i>South East</i>                                  |              |                |
| Average number of procedures per week              | 5106         | 591            |
| % reduction in activity drop compared to pre-Covid |              | 88.4           |
| <i>South West</i>                                  |              |                |
| Average number of procedures per week              | 3280         | 478            |
| % reduction in activity drop compared to pre-Covid |              | 85.4           |
| <i>West Midlands</i>                               |              |                |
| Average number of procedures per week              | 4169         | 609            |
| % reduction in activity drop compared to pre-Covid |              | 85.4           |
| <b>Scotland</b>                                    |              |                |
| Average number of procedures per week              | 1357         | 203            |
| % reduction in activity drop compared to pre-Covid |              | 85.1           |
| <b>Wales</b>                                       |              |                |
| Average number of procedures per week              | 1199         | 193            |
| % reduction in activity drop compared to pre-Covid |              | 83.9           |
| <b>Northern Ireland</b>                            |              |                |
| Average number of procedures per week              | 270          | 38             |
| % reduction in activity drop compared to pre-Covid |              | 84.5           |

\* pre-Covid 16/01/2020 to 15/03/2020; Covid impacted 23/03/2020-31/05/2020
